# Supplementary material for: Formation of bismuth nanosheets on copper foam coupled with nanobubble technology for enhanced electrocatalytic CO2 reduction
Source: Royal Society of Chemistry journal article supplement (doi:10.1039/d4ta06898j), 2024-01-01
Supplement: d4ta06898j4.pdf [file d4ta06898j4.pdf]

1  
2  
3  
4  
5  
6  
7  
8  
9  
10  
11  
12  
13  
14  
15  
16  
17  
18  
19

## Supporting Information

### Formation of Bismuth Nanosheets on Copper Foam Coupled with Nanobubble Technology for Enhanced Electrocatalytic CO<sub>2</sub> Reduction

Kai Wu <sup>a, b</sup>, Pengwei Yang <sup>a, b</sup>, Shuaijun Fan <sup>a, b</sup>, Yifan Wu<sup>b</sup>, Jingxiang Ma <sup>a, b</sup>, Lijuan Yang<sup>b</sup>,  
Hongtao Zhu<sup>b</sup>, Xiaoying Ma<sup>b</sup>, Heli Gao<sup>c</sup>, Wentong Chen<sup>c</sup>, Jun Jia<sup>c</sup>, Shuangchen Ma <sup>\*, a, b</sup>

*a MOE Key Laboratory of Resources and Environmental Systems Optimization, School of  
Environmental Science and Engineering, North China Electric Power University, Beijing, 102206,  
PR China.*

*b Hebei Key Laboratory of Power Plant Flue Gas Multi-Pollutants Control, Department of  
Environmental Science and Engineering, North China Electric Power University, Baoding, 071003,  
PR China.*

*c Shenzhen Energy Baoding Power Co., Ltd, Baoding, 072150, PR China.*

\*Corresponding author. Email address: msc1225@163.com (Shuangchen Ma).

## 20 Section S1. Materials and apparatus

### 21 Materials

22 Bismuth chloride ( $\text{BiCl}_3$ , 99%) and potassium bicarbonate ( $\text{KHCO}_3$ , >99.5%)  
23 were purchased from Aladdin (Shanghai, China). Dimethyl sulfoxide (DMSO, >99%),  
24 hydrochloric acid (HCl, 37%), acetone (>99.5%) and ethyl alcohol (EtOH, >99.5%)  
25 were purchased from Kermel (Tianjin, China). Carbon black (xc-72R, 10-20 nm),  
26 polyvinylidene fluoride (average Mw ~ 534000, powder) were purchased from Macklin  
27 (Shanghai, China). Copper foam (99.9%, 110 PPI) was purchased from Keshenghe  
28 technology Co., Ltd (Suzhou, China). Bismuth plate (1\*10\*10 mm, 99.9%) was  
29 purchased from Tengfeng metal materials Co., Ltd (Xingtai, China). Carbon paper  
30 (HCP020P, hydrophobic) purchased from Suzhou Shengernuo Technology Co., Ltd.  
31  $\text{CO}_2$  (99.9%) and  $\text{N}_2$ (99.9%) were purchased from Huawei Gas technology Co., Ltd  
32 (Baoding, China). The ultrapure water (18.4 M $\Omega$  cm) was prepared by a reverse  
33 osmosis high purity water machine (Xinjia environmental protection special equipment  
34 manufacturing Co. Ltd., Baoding, China).

### 35 Apparatus

36 X-ray diffraction (XRD) data were collected on a Bruker D8 ADVANCE  
37 instrument. Transmission electron microscopic (TEM) images were collected on a  
38 JEOL Jem-2100F instrument. Scanning electron microscopic (SEM) images were  
39 collected on a Thermo Fisher Quattro S instrument. Energy-dispersive X-ray  
40 spectroscopy (EDS) data were collected on a EDAX ELECT PIUS instrument. Atomic  
41 force microscopy (AFM) image was captured by Bruker Dimension icon XR in contact  
42 mode. X-ray photoelectron spectroscopy (XPS) data were collected on a Thermo Fisher  
43 Nexsa instrument. The particle size and zeta potential of  $\text{CO}_2$  bubbles in the electrolyte  
44 were determined with Zetasizer Nano ZS90 (Malvern, UK). The number concentration  
45 of  $\text{CO}_2$  bubbles in the electrolyte was measured with Zetaview-PMX120-Z (Particle  
46 Metrix, Germany). Formate concentration data were collected by SHIMADZU LC-20A  
47 high-performance liquid chromatograph. The electrochemical characteristics data were  
48 collected by DH 7000D electrochemistry workstation (Jiangsu Donghua Analytical  
49 Instrument Co., Ltd.).  $\text{CO}_2$  nanobubbles were produced from ZJC-NM-200L  
50 nanobubble generator (Shanghai Zhongjing Environmental Protection Technology Co.,  
51 Ltd.).

52

## 53 Section S2. Experimental section

### 54 Synthesis method

#### 55 *Synthesis of Bi/CF*

56 A piece of Cu foam was washed with acetone, transferred to 0.5 M HCl solution,  
57 ultrasonicated for 10 min, and rinsed with water and ethanol. The cleaned Cu foam was  
58 then immersed in dimethyl sulfoxide (DMSO) solution containing 0.01 M BiCl<sub>3</sub> and  
59 0.1 M HCl. The color of the Cu foam immediately changed from burgundy to dark  
60 brown. After 5 min, the Cu foam was removed from the solution and rinsed with water  
61 and ethanol. The obtained Bi coated Cu foam was dried under N<sub>2</sub> gas flow at room  
62 temperature and denoted as Bi/CF.

#### 63 *Synthesis of Bi<sub>2</sub>O<sub>3</sub>/CF and Bi NSs/CF*

64 The prepared Bi/CF was placed in a tube furnace and annealed at 200 °C for 2  
65 hours in an air atmosphere, with a heating rate of 2 °C·min<sup>-1</sup>. After naturally cooling  
66 the tube furnace to room temperature, the sample was retrieved and denoted as  
67 Bi<sub>2</sub>O<sub>3</sub>/CF. Subsequently, Bi<sub>2</sub>O<sub>3</sub>/CF was installed as the cathode (working electrode) in  
68 a single electrolysis cell. In a CO<sub>2</sub>-saturated 0.5 M KHCO<sub>3</sub> electrolyte, the working  
69 electrode underwent 20 cycles of cyclic voltammetry scans at a scan rate of 20 mV·s<sup>-1</sup>  
70 under a potential range of -0.2 to -1.2 V vs. RHE. This process ultimately produced  
71 copper foam coated with bismuth nanosheets, denoted as Bi NSs/CF.

### 72 Evaluation of catalyst performance

73 The performance evaluation of the materials were carried out using a typical H-  
74 type cell with a three-electrode system, in which the anode and cathode reaction cells  
75 were separated by a proton exchange membrane (N117, Dupont). The electrolyte was  
76 composed of 0.5 mol·L<sup>-1</sup> KHCO<sub>3</sub> solution, with Bi plate, Bi/CF or Bi NSs/CF as the  
77 working electrode (cathode), Ag/AgCl (saturated with KCl) as the reference electrode,  
78 and 0.2×10×10 mm platinum plate as the counter electrode (anode). Potentials while  
79 measured vs Ag/AgCl (saturated with KCl) are converted to the RHE scale using the  
80 formula:  $E \text{ (vs. RHE)} = E \text{ (vs. Ag/AgCl)} + 0.197 \text{ V} + 0.0591 \text{ V} \times \text{pH}$ . All  
81 electrochemical experiments were performed at room temperature (22 ± 1 °C). High-  
82 purity CO<sub>2</sub> was passed into the electrolyte to saturation (50 mL·min<sup>-1</sup> for 30 min) before  
83 the experiment, and CO<sub>2</sub> was continuously supplied to the electrolyte (50 mL·min<sup>-1</sup>)  
84 during the experiment. Notably, when experiments were conducted using an H-type  
85 cell that combines nanobubble technology with a flowing electrolyte, an intermittent  
86 CO<sub>2</sub> supply method was employed. Specifically, a nanobubble generator was integrated  
87 into the electrocatalytic system, operating for 5 minutes every hour during the  
88 experiment to produce an electrolyte rich in nano-sized CO<sub>2</sub> bubbles. The electrolyte  
89 volume was 400 mL, and the CO<sub>2</sub> flow rate was 800 mL·min<sup>-1</sup>. The potentials applied  
90 during bulk electrolysis were selected on the basis of voltammetric data obtained under  
91 the same conditions. Upon completion of the electrolysis, a syringe was employed to

92 extract a portion of the electrolyte, which was subsequently subjected to filtration  
 93 through a 4.5  $\mu\text{m}$  filter head. The filtered solution was then transferred into a vial and  
 94 sealed for preservation, in preparation for its utilization in high-performance liquid  
 95 chromatography (HPLC) analysis.

### 96 Analysis of the electrolysis products

97 The concentration of formate products was detected by SHIMADZU LC-20A  
 98 high-performance liquid chromatograph. The chromatographic column was AQ-C18 (5  
 99  $\mu\text{m}$ , 4.6 $\times$ 250 mm, Dalian Ilitar Supersil). The eluting method was binary high-pressure  
 100 gradient elution, mobile phase A was  $\text{CH}_3\text{OH}$ , mobile phase B was 0.05  $\text{mol}\cdot\text{L}^{-1}$   
 101  $\text{KH}_2\text{PO}_4$  (pH = 2.7), and the flow rates of mobile phase A and B were controlled to be  
 102 3% and 97% respectively to form buffer solution (volume fraction). The flow rate was  
 103 0.5  $\text{mL}\cdot\text{min}^{-1}$  at room temperature. The detection wavelength was 215 nm, and the  
 104 injection volume was 20  $\mu\text{L}$ . Before injection, phosphoric acid was used to adjust the  
 105 pH of the sample to 2.7. In this method, the characteristic peak of formate appears  
 106 around 7.2 minutes. The standard curve for formic acid is illustrated in Figure S1, and  
 107 its corresponding data is provided in Table S1.

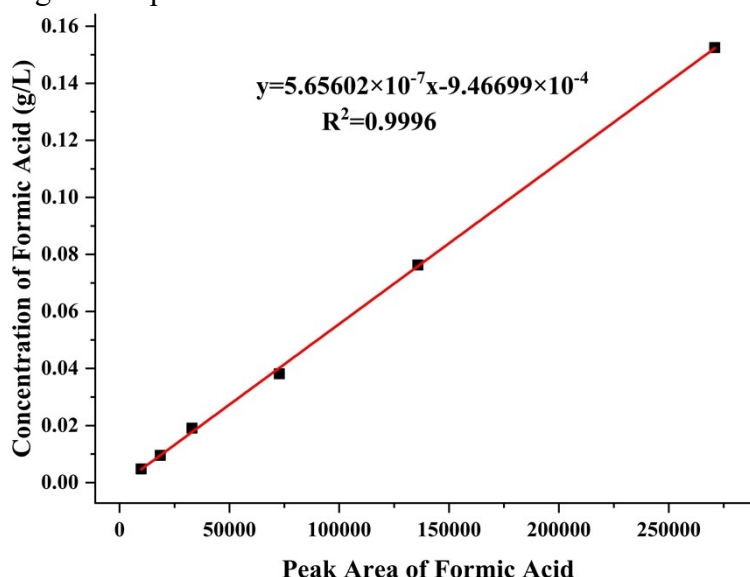

108

109

110

111

Figure S1. Standard curve of formate.

Table S1. Data relating to the standard curve for formic acid.

| Component | Linear range ( $\text{g L}^{-1}$ ) | Linear equation                                  | Coefficient of association |
|-----------|------------------------------------|--------------------------------------------------|----------------------------|
| Formate   | 0.00476563~0.1525                  | $y=5.65602\times 10^{-7}x-9.46699\times 10^{-4}$ | 0.9996                     |

112 Note:

113 y, the mass concentration of formate,  $\text{g L}^{-1}$ .

114 x, peak area of formate.

### 115 Calculation of faradaic efficiency, cathodic energy efficiency and $\text{CO}_2$ conversion

116 rate

117 The faraday efficiency of formate in liquid products was determined as follows:

$$118 \quad FE_{Formate}(\%) = \frac{Q_{Formate}}{Q_{Total}} \times 100\% = \frac{n \times N_{Formate} \times F}{I \times t} \times 100\%$$

119 Where,  $Q_{Formate}$  is the amount of electricity needed to produce formate, C.

120  $Q_{Total}$  is the electricity consumed by the entire electrochemical process, C.

121  $n$  is the number of electrons transferred from a molecule of  $CO_2$  to a molecule of formate,  
122 and since C in  $CO_2$  has a +4 valence, and C in formate has a +2 valence, so  $n$  is 2.

123  $N_{Formate}$  is the molar mass of formate in the liquid phase product, mol.

124  $F$  is Faraday constant,  $F=96485 \text{ C}\cdot\text{mol}^{-1}$ .

125  $I$  is the current, A.

126  $t$  is time, s.

127 The cathodic energy efficiency can be calculated as follows<sup>1-3</sup>:

$$128 \quad EE_{Formate}(\%) = \frac{E_{Water}^0 - E_{Formate}^0}{E_{Water}^0 - E_{Applied}} \times FE_{Formate} \times 100\%$$

129 Where,  $E_{Water}^0$  represents the standard water oxidation potential, here taken as 1.23 V.

130  $E_{Formate}^0$  represents the standard electrode potential for formate production, here taken as -  
131 0.20 V.

132  $E_{Applied}$  is the applied potential, V.

133  $EE_{Formate}$  is the cathodic energy efficiency of formate production, %.

134 The  $CO_2$  conversion rate was calculated as follows:

$$135 \quad CO_2 \text{ conversion rate}(\%) = \frac{N_{Formate}}{N_{CO_2}} \times 100\%$$

136 Where,  $N_{CO_2}$  is the  $CO_2$  molar flow rate at the inlet of the cathode chamber, mol. Here, due to the  
137 differences in  $CO_2$  gas supply forms, the  $CO_2$  supply amount was normalized, as detailed in Table  
138 S3.

### 139 DFT calculations

140 Spin-unrestricted first-principles calculations were performed using the Dmol3  
141 software package<sup>4</sup>. The Perdew-Burke-Ernzerhof (PBE) generalized gradient  
142 approximation (GGA) was employed to approximate the exchange-correlation  
143 functional. The double numerical polarization (DNP) basis set and DFT semicore  
144 pseudopotentials (DSPP) were utilized to accurately describe the core and valence  
145 electrons, respectively. A truncation radius of 5.0 Å was employed, and the  
146 convergence criteria for all geometry optimizations were set as an energy difference of  
147  $1.0 \times 10^{-5}$  Ha (where 1 Ha = 27.2114 eV) between adjacent structures, a maximum force  
148 of 0.002 Ha/Å per atom, and a maximum displacement of 0.005 Å. The standard unit  
149 cells of Bi and Cu were obtained from the ICSD database<sup>5</sup>. After structural  
150 optimization, the unit cells were sliced to expose the (0 1 2) crystal plane of Bi  
151 ( $a=4.7657$  Å,  $b=4.9426$  Å) and the (1 1 1) crystal plane of Cu ( $a=8.7052$  Å,  $b=5.0260$   
152 Å). Subsequently, the (0 1 2) crystal plane of Bi and the (1 1 1) crystal plane of Cu  
153 underwent  $2 \times 2$  and  $1 \times 2$  supercell treatments (Bi(0 1 2)-layer:  $a= 9.5314$  Å,  $b= 9.8852$

154 Å; Cu(1 1 1)-layer: a= 8.7052 Å, b= 10.0519 Å), respectively, to facilitate the  
 155 construction of the Bi/Cu heterojunction. Two layers of Bi(0 1 2)-layer were stacked  
 156 on two layers of Cu(1 1 1)-layer, and a vacuum layer of 15 Å was established along the  
 157 z-axis, resulting in the Bi(0 1 2)/Cu(1 1 1) configuration. The lattice mismatch rate in  
 158 the a direction is  $9.5314-8.7052/9.5314*100\%=8.6678\%$ , and in the b direction, it is  
 159  $10.0519-9.8852/10.0519*100\%=1.6583\%$ , both of which are less than 10%. The Bi(0  
 160 1 2)/Cu(1 1 1)-Defect model was constructed based on the Bi(0 1 2)/Cu(1 1 1)  
 161 configuration by removing some Cu atoms from the third layer. The Bi(0 1 2) model  
 162 was composed of four layers of Bi(0 1 2)-layer stacked together. All configurations  
 163 were structurally optimized. During geometry optimization and electronic performance  
 164 calculations, Monkhorst-Pack k-points were chosen as  $3\times 3\times 1$  in the first Brillouin zone.  
 165 Solvent models were not considered in this study.

166 The reaction steps for electrochemical reduction of CO<sub>2</sub> to formic acid (equation  
 167 1~2), CO (equation 3~4) and competing HER (equation 5~6) are as follows:

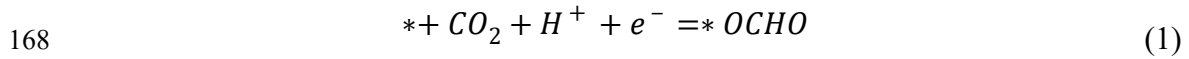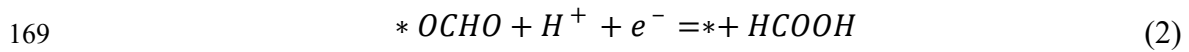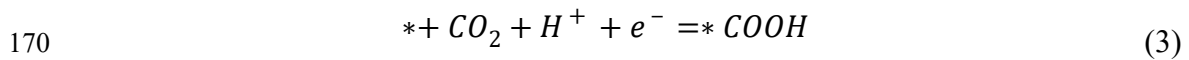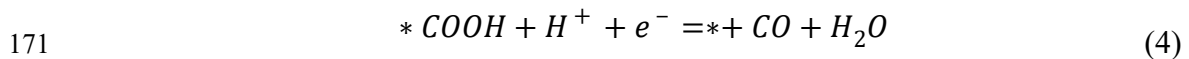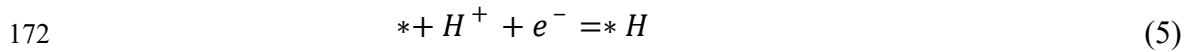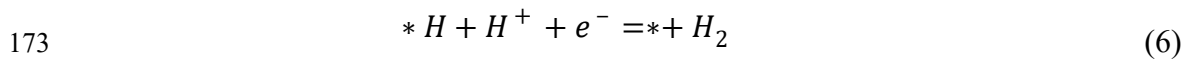

174 where \* is the adsorption site, \*H, \*OCHO and \*COOH are the reaction intermediates,  
 175 respectively. The Gibbs free energy G of the computational model is defined as<sup>6</sup>:

176 
$$G = E_{DFT} + E_{ZPE} + \int C_p dT - TS \quad (7)$$

177 where E<sub>DFT</sub>, E<sub>ZPE</sub>, C<sub>p</sub> and S are the electronic energy, zero-point energy, heat capacity  
 178 and entropy, respectively. For adsorption intermediates, E<sub>ZPE</sub>, S and C<sub>p</sub> were  
 179 determined by vibrational frequency calculations via standard methods. The  
 180 calculations were all performed using the computational hydrogen electrode (CHE)  
 181 model, which assumes that the free energy of protonation of H<sub>2</sub> is zero under standard  
 182 conditions. The electron energy (E<sub>DFT</sub>), zero-point energy correction (E<sub>ZPE</sub>), heat  
 183 capacity and entropy contributions ( $\int C_p dT - TS$ ) in this study are shown in Table S4. The  
 184 free energy changes ( $\Delta G$ ) of the reaction paths in this study are shown in Table S5.

185

186 **Section S3. Supplementary figures and tables**

187 Copper foams were immersed in a DMSO solution containing 0.01 M BiCl<sub>3</sub> and  
188 0.1 M HCl to investigate the effect of the duration of Bi<sup>3+</sup>/Cu galvanic replacement on  
189 the Cu/Bi composition ratio and physical stability of the materials.

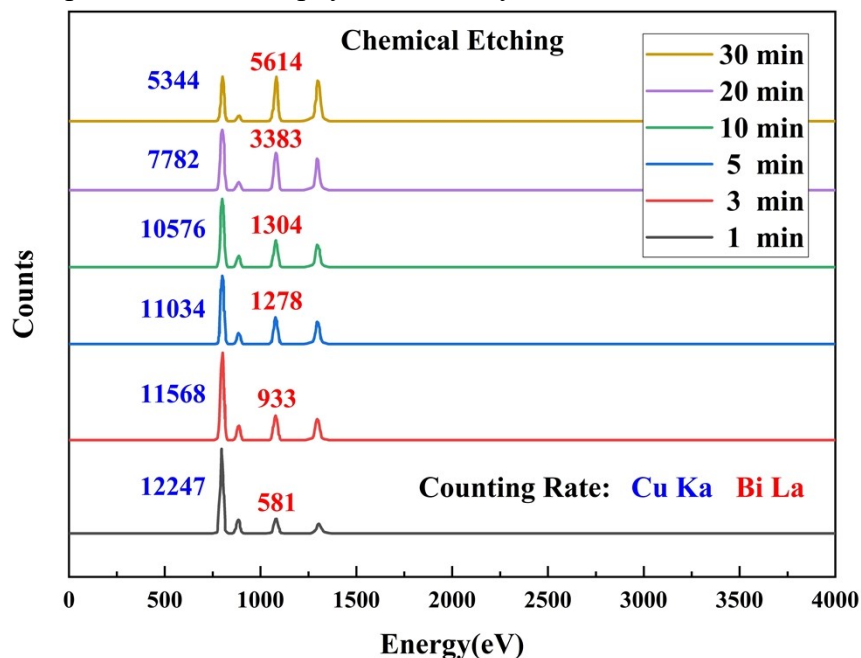

190  
191 Figure S2. The operation time of Bi chemical etching instead of Cu directly affects the proportion  
192 of Cu/Bi components in the material.

193 The results showed that as the duration of the Bi chemical etching of Cu extended,  
194 the content of Bi in the material initially exhibited a rapid increase (from 1 to 5 minute,  
195 indicated by the black, red and blue lines in Figure S2), suggesting that the Cu were  
196 quickly chemically substituted by Bi. Subsequently, the Bi content in the material  
197 stabilized (from 5 to 10 minutes, shown by the blue and green lines in Figure S2),  
198 indicating that after 5 minutes of chemical etching, the Cu foam surface had achieved  
199 near-complete coverage with a Bi coating. At this point, the reduction in the Cu surface  
200 area slowed down the Bi loading process. However, during this period, the formed Bi  
201 coating would slowly react with HCl in the solution, regenerating BiCl<sub>3</sub>, which then  
202 dissolved back into the solution. This triggered a chain etching reaction involving the  
203 "slow dissolution of the Bi coating," followed by the "exposure of fresh Cu surfaces,"  
204 and subsequently the "reformation of the Bi coating." As the operation time was  
205 extended further (from 10 to 30 minutes, indicated by the green, purple and yellow lines  
206 in Figure S2), Bi etching gradually penetrated deeper into the interior of the Cu foam,  
207 which was evidenced by a significant change in the Cu/Bi compositional ratio within  
208 the material.

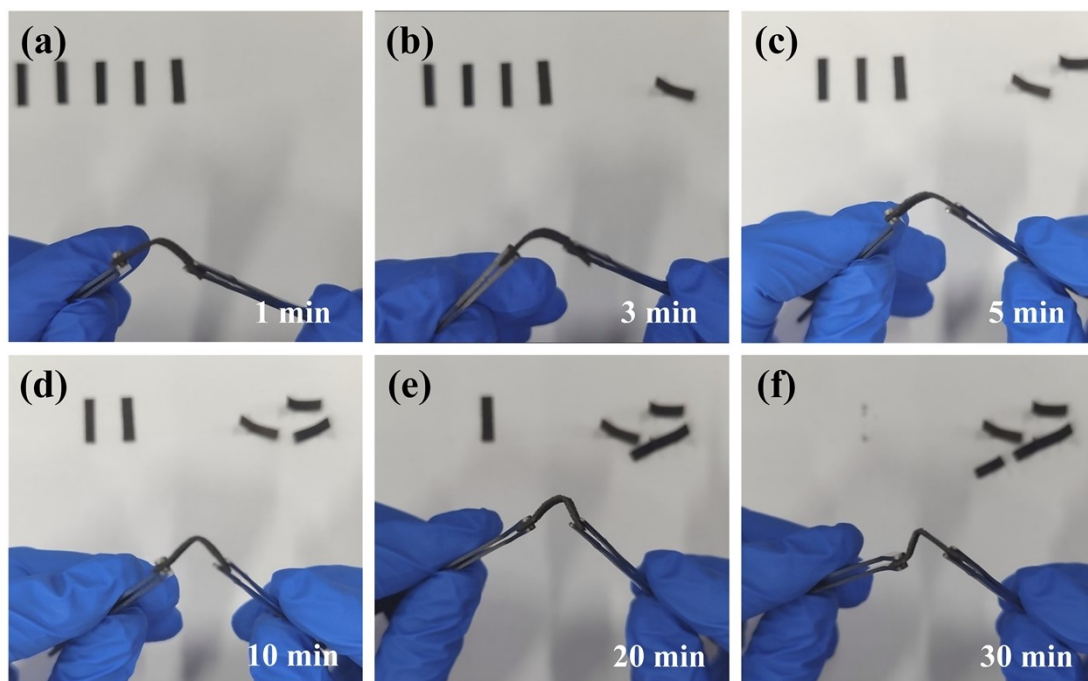

209

210 Figure S3. The operation time of Bi chemical etching instead of Cu is directly related to the  
211 physical structure stability of the material.

212 As the experimental results showed, prolonged etching led to the complete  
213 replacement of the Cu skeleton by Bi, reducing the material's mechanical properties.  
214 Such an outcome is detrimental for its use as an electrode, as it would decrease the  
215 electrode's lifespan in long-term electrochemical activities.

216 In summary, to achieve near-complete coverage of the Cu foam surface with a Bi  
217 coating while ensuring sufficient physical structural stability, a 5-minute operation time  
218 was determined as the optimal duration for the  $\text{Bi}^{3+}/\text{Cu}$  galvanic replacement process  
219 in a DMSO solution containing 0.01 M  $\text{BiCl}_3$  and 0.1 M HCl.

220



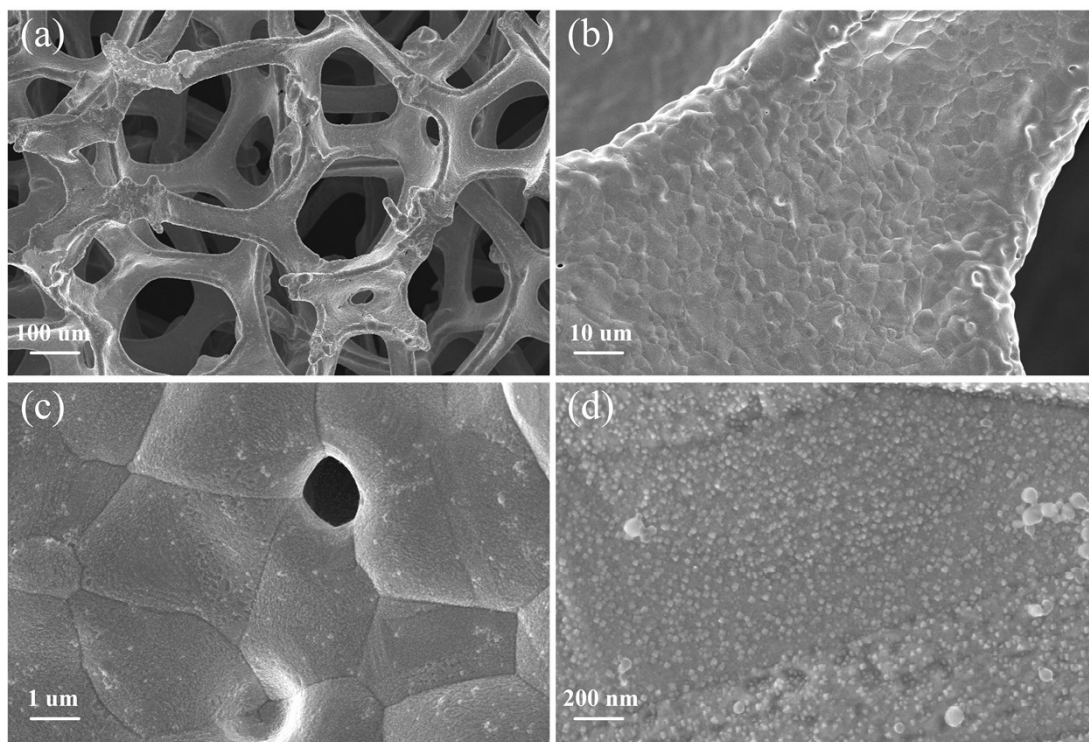

221  
222  
223

Figure S4. SEM images of Cu foam.

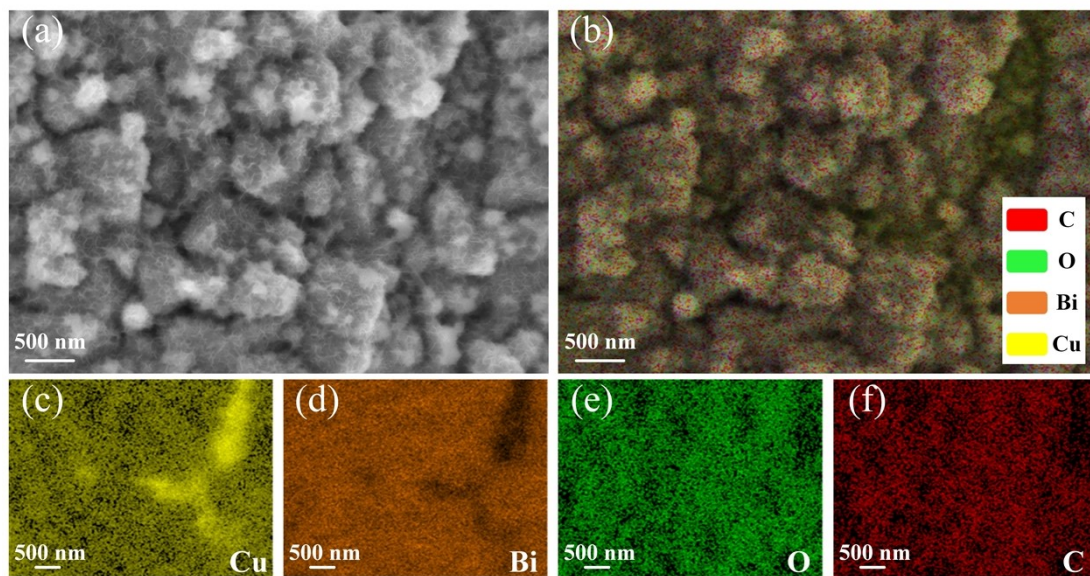

224

225 Figure S5. (a) SEM image of Bi NSs/CF. (b-f) SEM EDS mapping images of Bi NSs/CF.

226

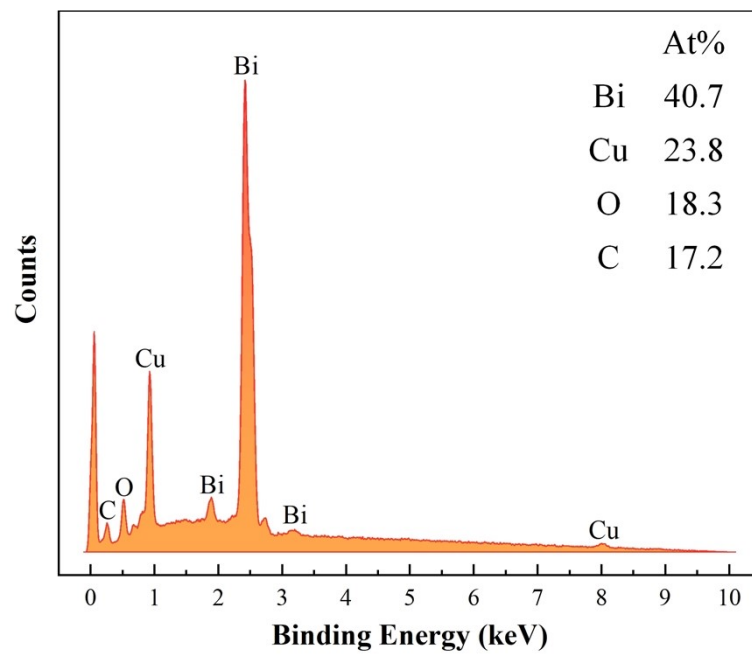

227

228

229

Figure S6. SEM EDS pattern of Bi NSs/CF and corresponding semi-quantitative results.

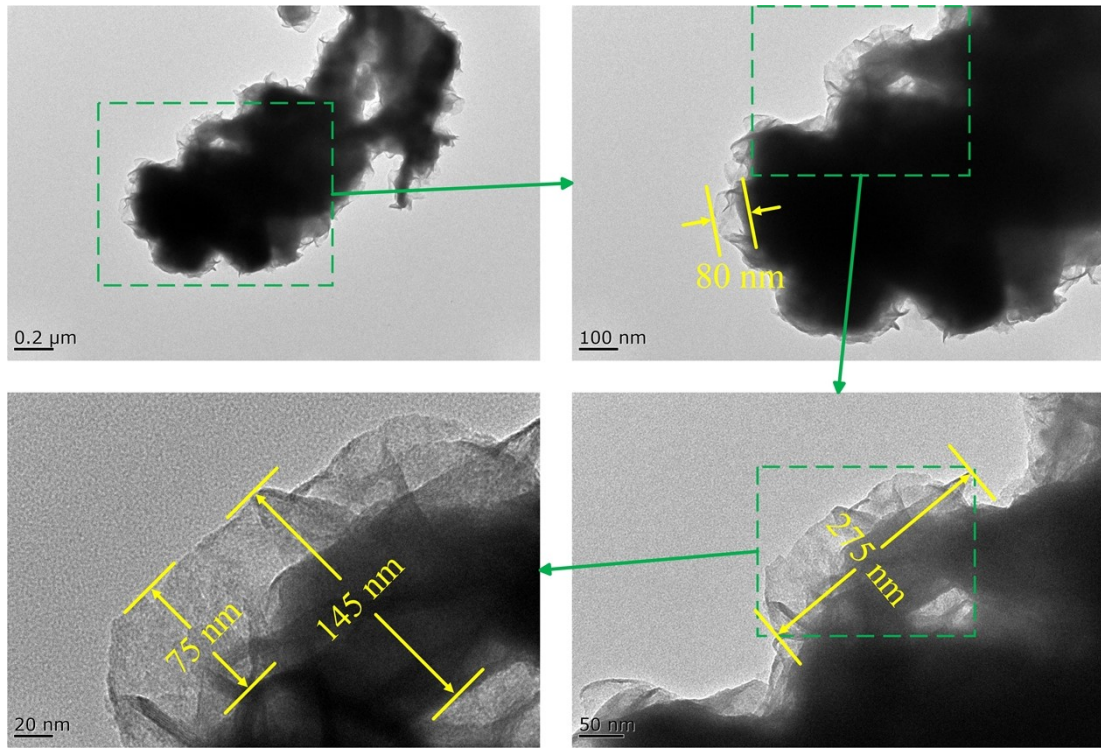

230

231

232

Figure S7. TEM images of Bi NSs with corresponding dimensional measurements.

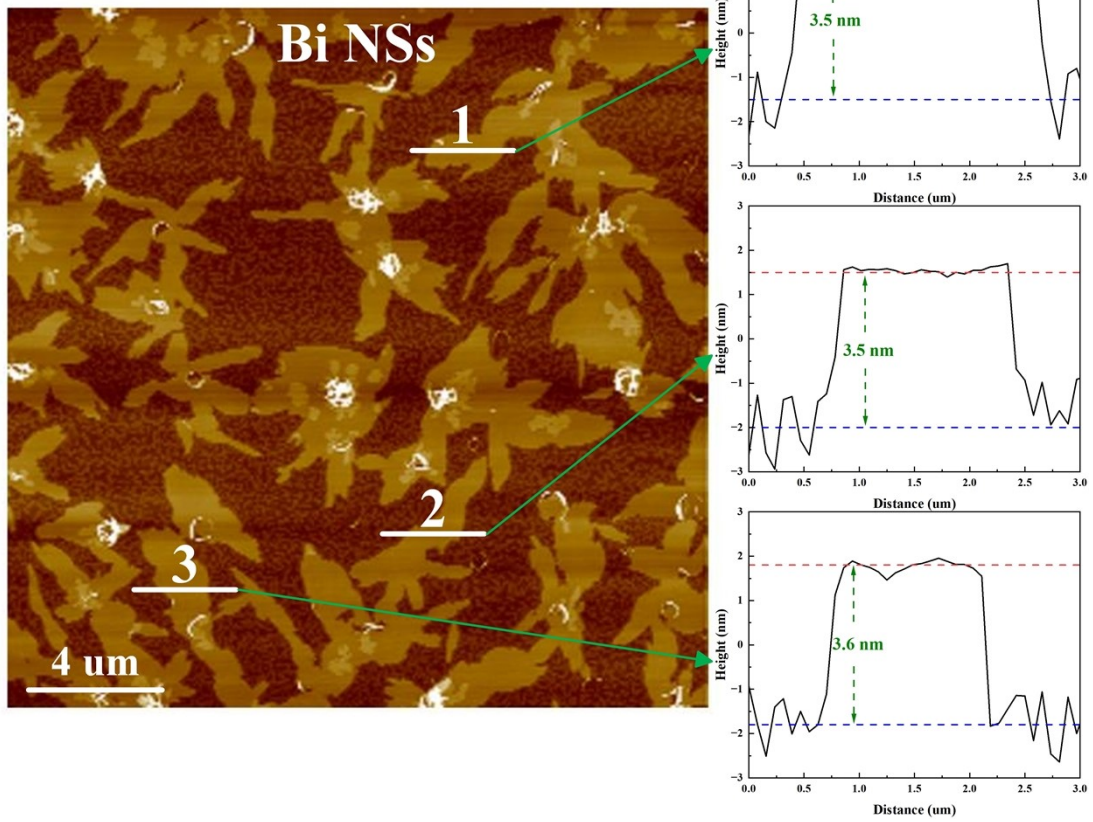

233

234

235

Figure S8. AFM image of Bi NSs with corresponding thickness labeling.

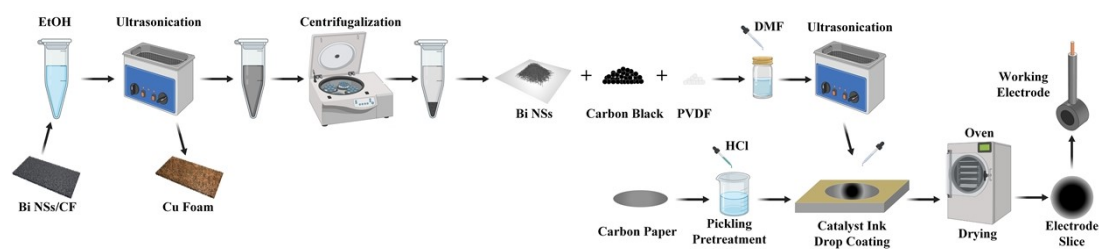

236

237

Figure S9. Flow chart for preparation of Bi NSs/CP electrode.

238 To evaluate the CO<sub>2</sub>RR characteristics of Bi NSs, we stripped the Bi NSs from the  
 239 Bi NSs/CF material and loaded them onto carbon paper (CP) to form the Bi NSs/CP  
 240 electrode, which was tested in an H-type cell equipped with a three-electrode system.

241 The specific preparation process of the Bi NSs/CP electrode is illustrated in Figure  
 242 S9. Initially, the Bi NSs/CF material was placed in an ethanol solution and  
 243 ultrasonicated for 30 minutes to strip the Bi NSs from the surface of the material into  
 244 the solution. Afterwards, clean ceramic tweezers were used to remove the Cu foam  
 245 stripped of Bi NSs from the solution, and the ethanol solution containing the Bi NSs  
 246 was transferred to a centrifuge tube and centrifuged at 5000 rpm for 10 minutes. The  
 247 supernatant was discarded, and the resultant grey black Bi NSs material was dried in an  
 248 oven at 70 °C for 1 hour and collected for further use. Next, the Bi NSs, carbon black,  
 249 and polyvinylidene fluoride (PVDF) were mixed in a mass ratio of 8:1:1 and added to  
 250 a 10 ml vial. A certain amount of DMF was added to wet and dissolve the mixture  
 251 (equivalent to 0.1 g of solid material combined with 1 ml of DMF). The vial was then  
 252 placed in an ultrasonic bath and sonicated at room temperature for 30 minutes to obtain  
 253 a uniformly dispersed catalyst ink. A specific volume of this catalyst ink was evenly  
 254 drop-cast onto pre-treated carbon paper (50 μl of catalyst ink drop-cast onto a circular  
 255 carbon paper with a diameter of 5.5 mm, effective electrode area of 0.94985 cm<sup>2</sup>). The  
 256 coated carbon paper was air-dried at room temperature for 30 minutes to promote initial  
 257 solidification of the catalyst ink. The sample was then transferred to an oven at 70 °C  
 258 and dried for 1 hour to obtain the electrode sheet. The electrode sheet was fixed in an  
 259 electrode holder to form the working electrode.

260



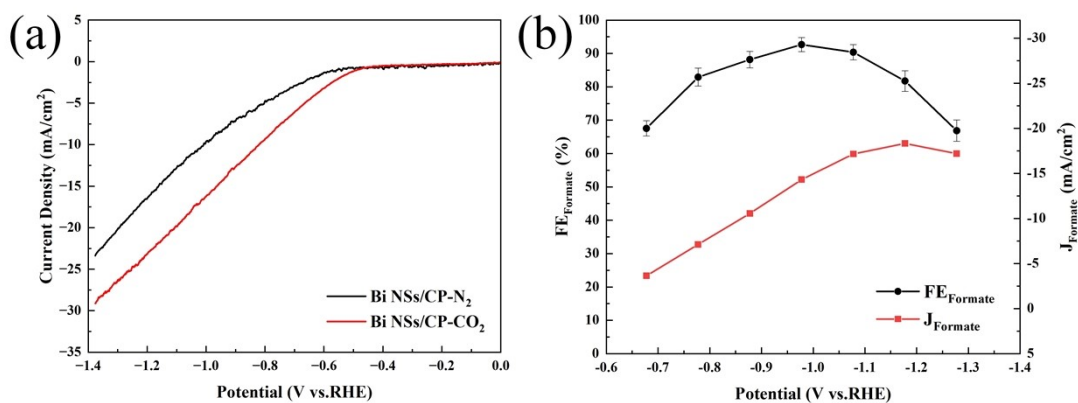

261

262

Figure S10. CO<sub>2</sub>RR performance of Bi NSs/CP.

263 (a) LSV curves in N<sub>2</sub> or CO<sub>2</sub> atmosphere. (b) Faradaic efficiencies and partial current densities of  
264 formate.

265 The results indicated that in terms of formate selectivity, the Bi NSs/CP electrode  
266 performed at a similar level to the Bi NSs/CF electrode, suggesting that the Bi NSs  
267 were the source of this excellent CO<sub>2</sub>RR activity. However, the total current density  
268 achieved with the Bi NSs/CP electrode was significantly lower than that of the Bi  
269 NSs/CF electrode. This difference was attributed to the advantages of the integrated  
270 structure of the Bi NSs/CF material, which does not require electrode binders and  
271 benefits from superior conductivity and faster electron transfer rates.

272

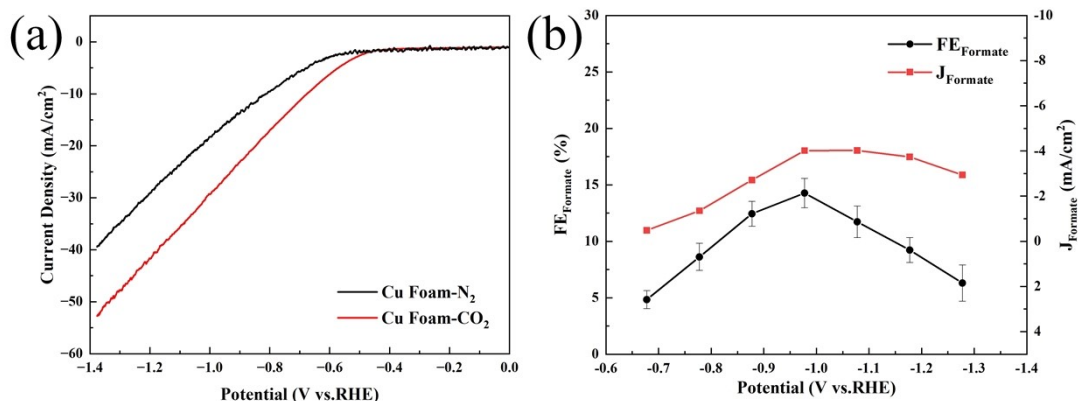

273

274

Figure S11. CO<sub>2</sub>RR performance of Cu foam.

275 (a) LSV curves in N<sub>2</sub> or CO<sub>2</sub> atmosphere. (b) Faradaic efficiencies and partial current densities of  
276 formate.

277 Performance tests for CO<sub>2</sub>RR were conducted on the Cu foam material, including  
278 LSV comparisons in N<sub>2</sub> and CO<sub>2</sub> atmospheres, and experiments to measure the  
279 selectivity for formate and formate partial current densities at various applied  
280 potentials. The experimental results showed that as the applied potential became more  
281 negative, the selectivity of the Cu foam for formate initially increased and then  
282 decreased. The maximum value of FE<sub>Formate</sub> was achieved at -0.98 V, with a value of  
283 14.27%, which was significantly lower than that of Bi NSs/CF (FE<sub>Formate</sub> = 93.73%, -  
284 0.98 V). This indicates that the pure Cu interface does not exhibit excellent CO<sub>2</sub>RR  
285 activity.

286



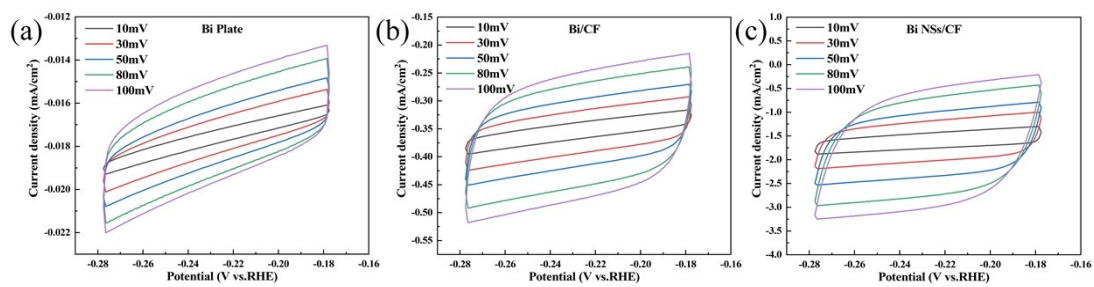

287

288 Figure S12. Cyclic voltammogram (CV) curves of (a) Bi plate, (b) Bi/CF and (c) Bi NSs/CF in  
 289 CO<sub>2</sub> saturated 0.5 M KHCO<sub>3</sub> electrolyte between -0.277 V and -0.177 V vs. RHE.

290

291 Table S2. The corresponding EIS parameters of Bi Plate, Bi/CF and Bi NSs/CF electrodes.

| Electrode materials | Bi Plate | Bi/CF | Bi NSs/CF |
|---------------------|----------|-------|-----------|
| Rs( $\Omega$ )      | 4.66     | 4.64  | 4.71      |
| Rct( $\Omega$ )     | 3.20     | 2.89  | 2.53      |

292

293

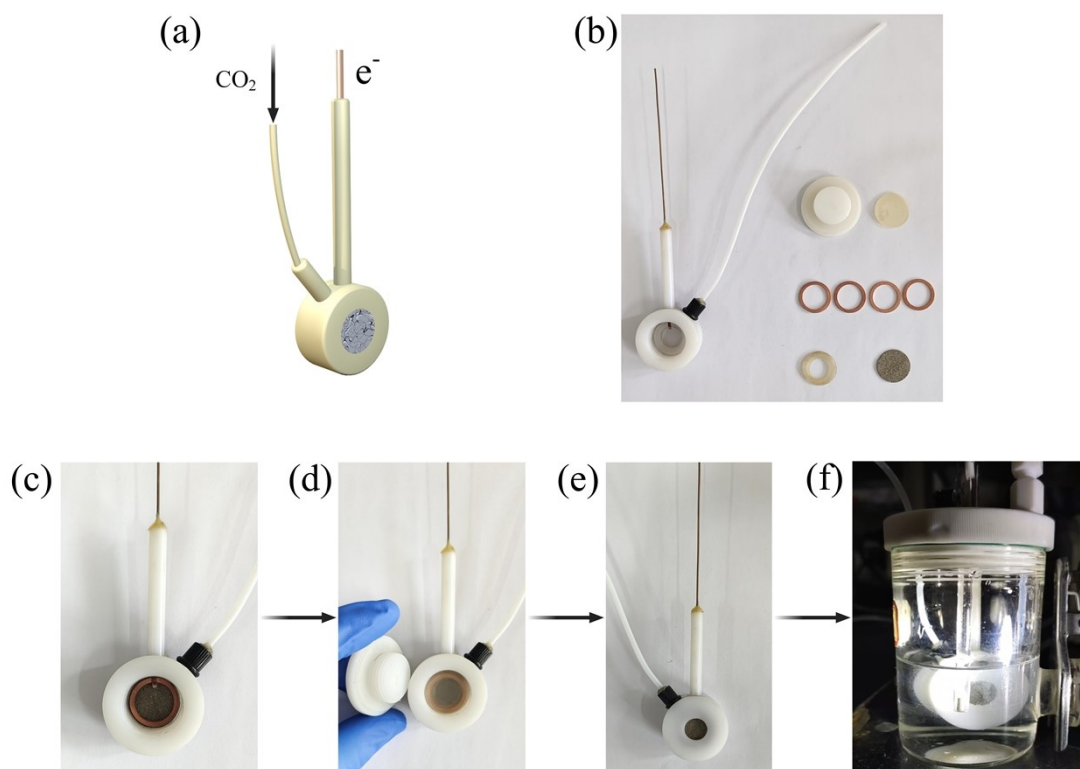

294

295

296

297

298

Figure S13. Structure and assembly of the cathode electrode support.

(a) Schematic diagram of the electrode support structure. (b) Physical diagram of disassembled electrode support structure. (c-d) Assembly process of the electrode support.

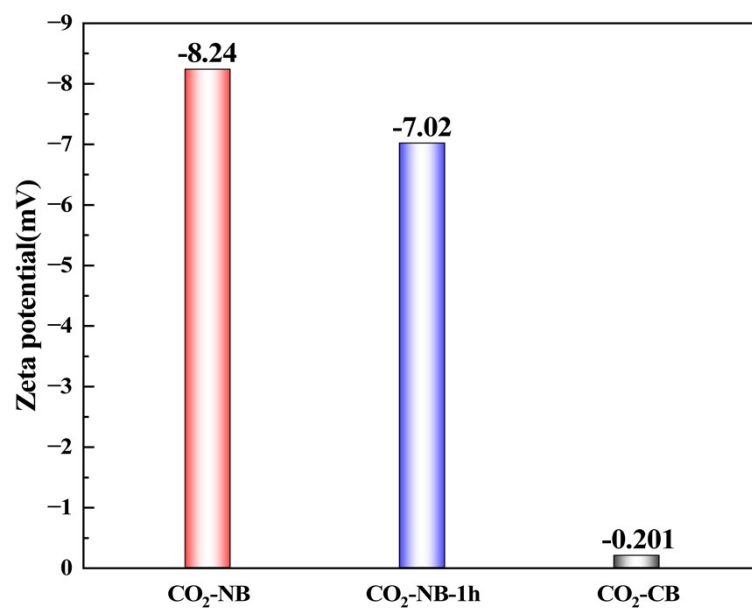

299

300 Figure S14. Zeta potential of fresh nanobubbles (CO<sub>2</sub>-NB), nanobubbles after 1 h of participation  
301 in the CO<sub>2</sub>RR (CO<sub>2</sub>-NB-1h), and bubbles of conventional saturated CO<sub>2</sub> (CO<sub>2</sub>-CB).

302

303 Table S3. Calculation of CO<sub>2</sub> supply in conventional bubble form and nano-bubble form.

| Calculation item                                                             | CO <sub>2</sub> supply form |                       |
|------------------------------------------------------------------------------|-----------------------------|-----------------------|
|                                                                              | Conventional bubbling       | NB                    |
| CO <sub>2</sub> supply rate (mL/min)                                         | 50                          | 800                   |
| CO <sub>2</sub> supply per hour (mL)                                         | 50*60=3000                  | 800*5=4000            |
| Electrolyte volume (mL)                                                      | 70                          | 400                   |
| Gas-liquid ratio(mL/mL)                                                      | 3000/70=42.86               | 4000/40=10            |
| Normalized to the amount of gas required per hour for 100mL electrolyte (mL) | 42.86*100=4286              | 10*100=1000           |
| CO <sub>2</sub> supply per hour (mol/100mL)                                  | 4286/1000/22.4=0.1913       | 1000/1000/22.4=0.0446 |

304 The conventional CO<sub>2</sub> supply mode adopts the continuous CO<sub>2</sub> bubbling mode,  
 305 while the NB mode adopts the intermittent working mode and supplies 5 minutes per  
 306 hour, which can complete the sufficient CO<sub>2</sub> supply. The CO<sub>2</sub> supply in both forms is  
 307 normalized to the amount of substances that supply CO<sub>2</sub> per hour per 100mL of  
 308 electrolyte.  
 309

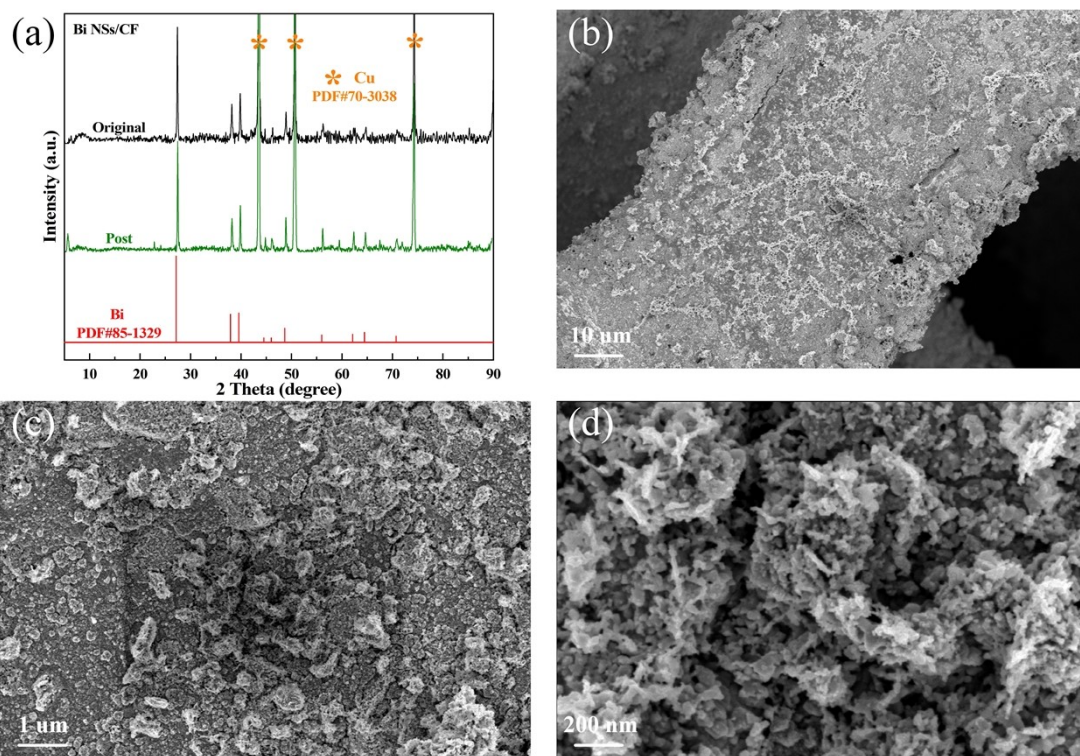

310

311 Figure S15. (a) XRD pattern and (b-d) SEM images of Bi NSs/CF obtained after long-term bulk  
312 electrolysis.

313

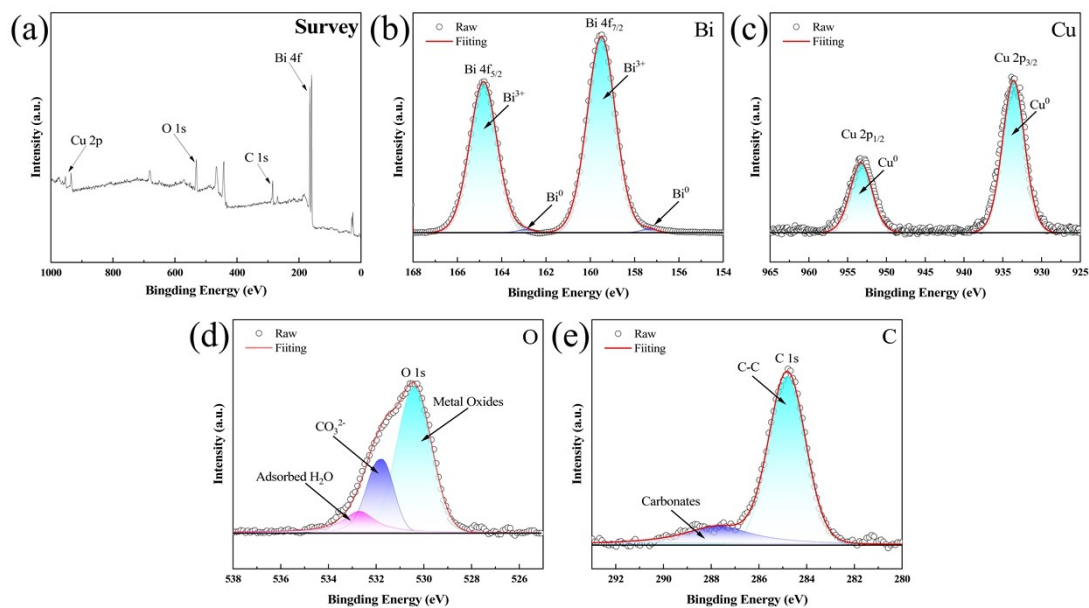

314

315 Figure S16. XPS spectra of (a) Bi NSs/CF composite and individual element of (b) Bi, (c) Cu, (d)  
 316 O and (e) C at high-resolution after long-term bulk electrolysis.

317 After long-term bulk electrolysis, XPS analysis was performed on Bi NSs/CF to  
 318 analyze the changes in the valence states of surface elements. From the high-resolution  
 319 spectrum of Bi (Figure S16b), it was found that the characteristic peaks of Bi<sup>0</sup> at 4f 7/2  
 320 and 4f 5/2 were significantly weakened, suggesting a reduction in the content of Bi<sup>0</sup> on  
 321 the electrode surface. Meanwhile, in the high-resolution O spectrum (Figure S16d), a  
 322 notable enhancement of the signature peak at 531.7 eV, corresponding to oxygen in  
 323 carbonate, was observed. Additionally, the characteristic peak observed at 287.72 eV  
 324 in the high-resolution spectrum of C (Figure S16e) is likely attributable to the carbon  
 325 in carbonyl (C=O) or carbonate (CO<sub>3</sub><sup>2-</sup>). Based on these observations, we speculate that  
 326 after prolonged electrochemical reactions, a compound similar to Bi<sub>2</sub>O<sub>2</sub>CO<sub>3</sub> may have  
 327 formed on the surface of Bi NSs/CF. Furthermore, no related oxidation peaks were  
 328 found in the high-resolution spectrum of Cu (Figure S16c).

329

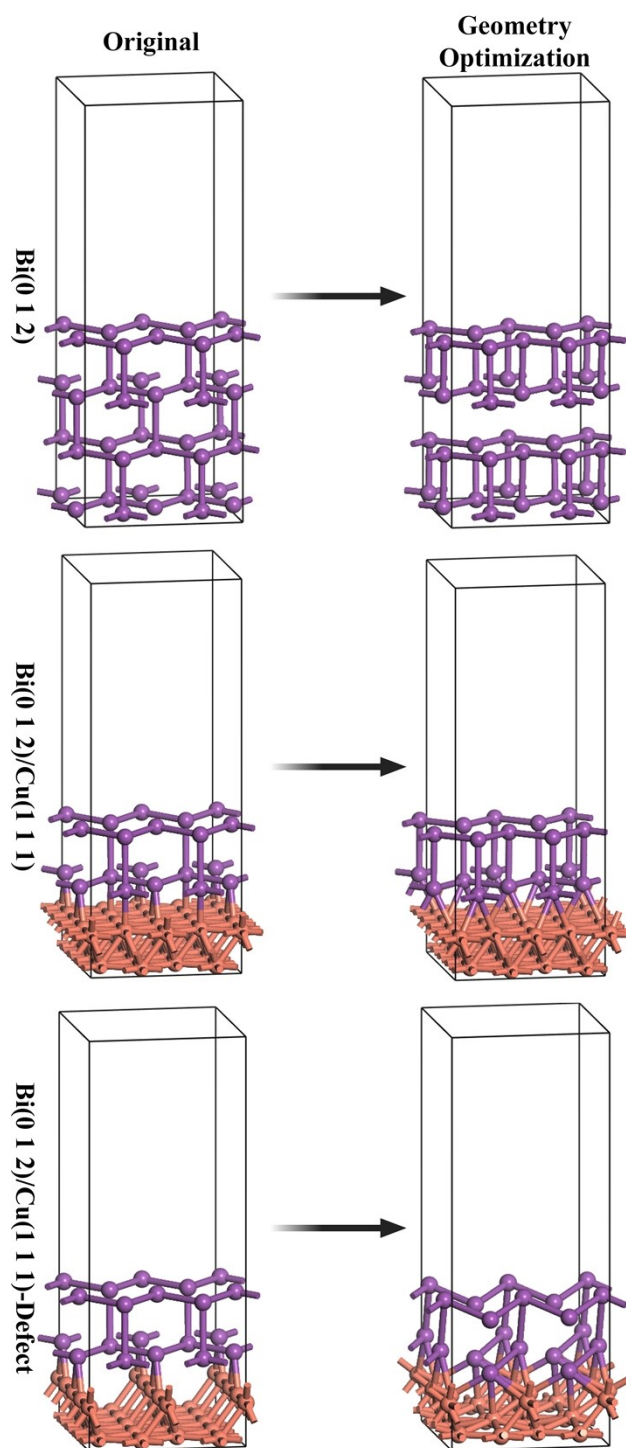

330

331 Figure S17. Initial configurations and optimized configurations of Bi(0 1 2), Bi(0 1 2)/Cu(1 1 1)  
 332 and Bi(0 1 2)/Cu(1 1 1)-Defect structures.

333 In these structures, the Bi(0 1 2) structure consists of four layers of Bi(0 1 2) crystal  
 334 planes; the Bi(0 1 2)/Cu(1 1 1) structure comprises two layers of Bi(0 1 2) crystal planes  
 335 and two layers of Cu(1 1 1) crystal planes; and the Bi(0 1 2)/Cu(1 1 1)-Defect structure  
 336 is derived from the Bi(0 1 2)/Cu(1 1 1) structure by stripping away part of the atoms  
 337 from the third layer of the Cu(1 1 1) crystal plane from top to bottom. Structural  
 338 optimization was carried out on all the structures.

339

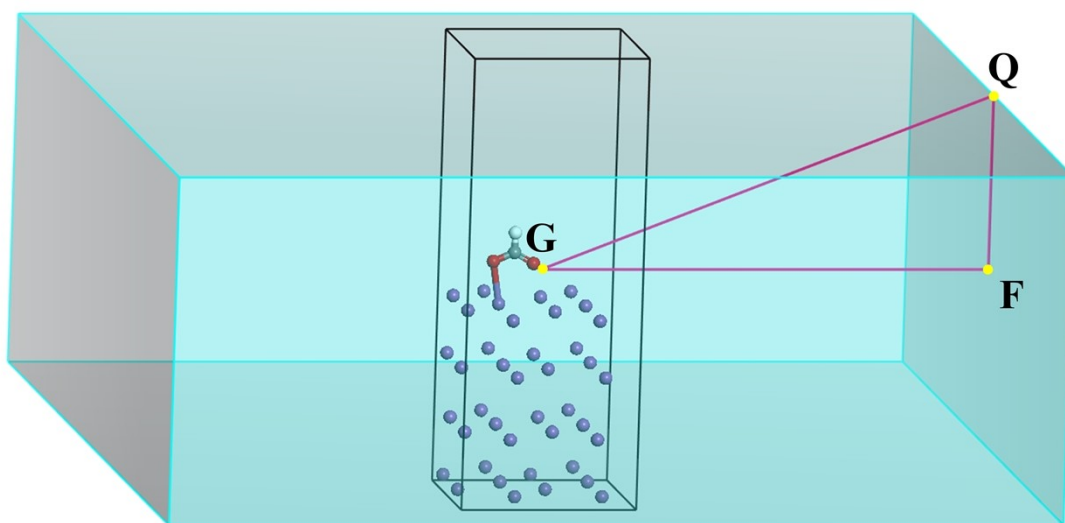

340

341

Figure S18. Brillouin zone path.

342 The path of the Brillouin zone was as follows: it started at point Q (0, 0.5, 0.5),  
343 proceeded to point G (0, 0, 0), then moved to point F (0, 0.5, 0), and finally returned to  
344 point Q.

345



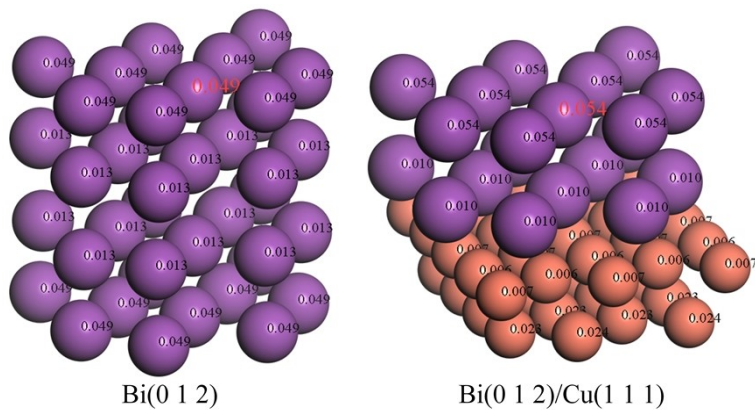

346

347 Figure S19. Distribution of electrophilic attack indices on  $\text{Bi}(0\ 1\ 2)$  and  $\text{Bi}(0\ 1\ 2)/\text{Cu}(1\ 1\ 1)$ .

348

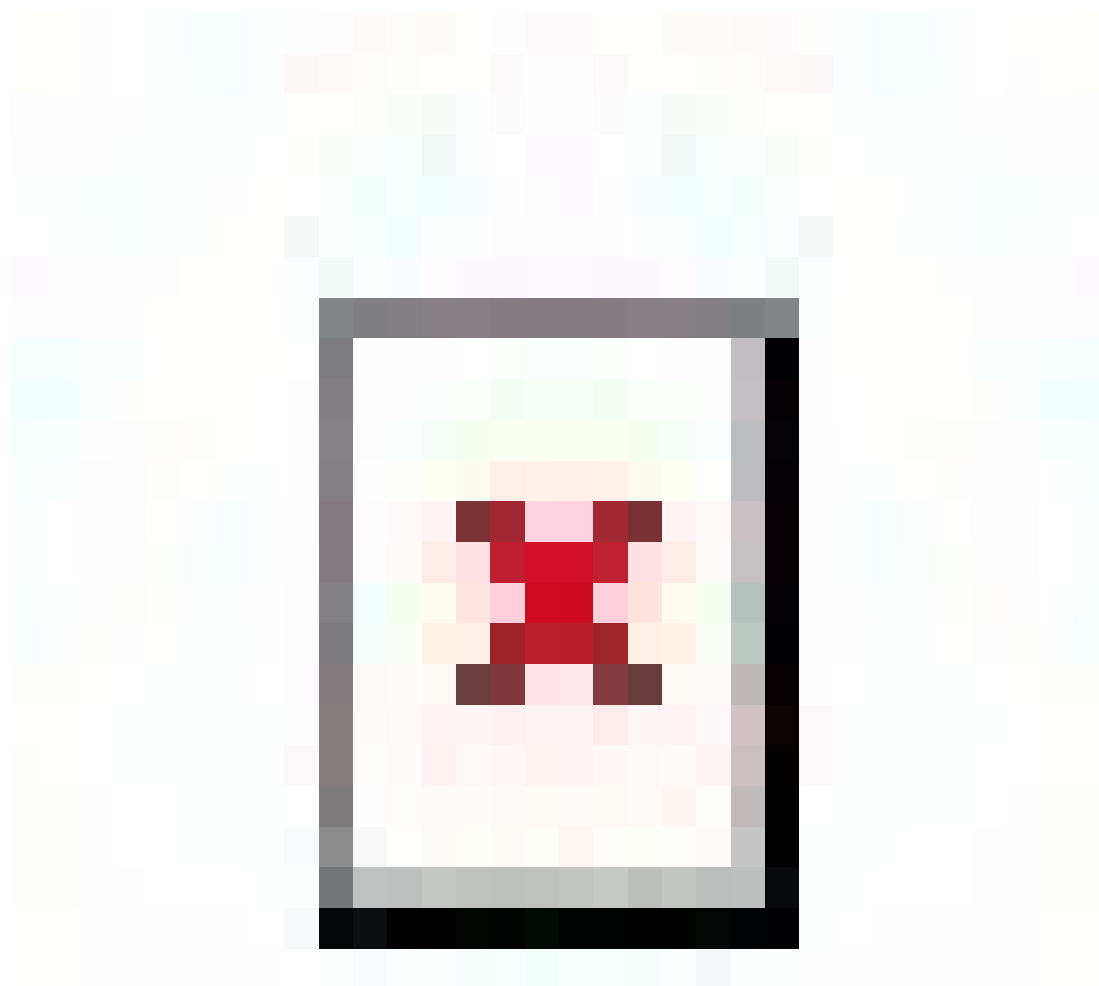

349

350 Figure S20. Differential charge density plot of the \*OCHO intermediate adsorbed on Bi(0 1 2),  
351 Bi(0 1 2)/Cu(1 1 1) and Bi(0 1 2)/Cu(1 1 1)-Defect structures. Red: charge accumulation, blue:  
352 charge depletion.

353

354 Table S4. Electronic energy ( $E_{\text{DFT}}$ ), zero point energy correction ( $E_{\text{ZPE}}$ ), heat capacity and entropy  
 355 contribution ( $\int \text{CpdT-TS}$ ) in this study.

| Species                             | $E_{\text{DFT}}$ (eV) | $E_{\text{ZPE}}$ (eV) | $\int \text{CpdT-TS}$ (eV) |
|-------------------------------------|-----------------------|-----------------------|----------------------------|
| H <sub>2</sub>                      | -31.7451              | 0.2701                | -0.4208                    |
| CO <sub>2</sub>                     | -5128.7458            | 0.3008                | -0.5648                    |
| HCOOH                               | -5160.6404            | 0.8938                | -0.7688                    |
| H <sub>2</sub> O                    | -2078.4844            | 0.5682                | -0.6016                    |
| CO                                  | -3081.2212            | 0.1323                | -0.6110                    |
| Bi(0 1 2)                           | -124872.2568          | 0                     | 0                          |
| Bi(0 1 2)/Cu(1 1 1)                 | -256221.6609          | 0                     | 0                          |
| Bi(0 1 2)/Cu(1 1 1)-Defect          | -207769.6382          | 0                     | 0                          |
| *H on Bi(0 1 2)                     | -124887.4126          | 0.1459                | -0.0073                    |
| *H on Bi(0 1 2)/Cu(1 1 1)           | -256236.9266          | 0.1392                | -0.0088                    |
| *H on Bi(0 1 2)/Cu(1 1 1)-Defect    | -207784.92            | 0.1499                | -0.0106                    |
| *OCHO on Bi(0 1 2)                  | -130016.7336          | 0.5881                | -0.1647                    |
| *OCHO on Bi(0 1 2)/Cu(1 1 1)        | -261366.2515          | 0.5966                | -0.1564                    |
| *OCHO on Bi(0 1 2)/Cu(1 1 1)-Defect | -212914.3013          | 0.6068                | -0.1752                    |
| *COOH on Bi(0 1 2)                  | -130016.1683          | 0.5997                | -0.1516                    |
| *COOH on Bi(0 1 2)/Cu(1 1 1)        | -261365.7744          | 0.6017                | -0.1851                    |
| *COOH on Bi(0 1 2)/Cu(1 1 1)-Defect | -212913.7450          | 0.6004                | -0.1574                    |

356

357

Table S5.  $\Delta G$  of Reaction Path in this study.

| $\Delta G$ of Reaction Path (eV)  | Surface   |                     |                            |
|-----------------------------------|-----------|---------------------|----------------------------|
|                                   | Bi(0 1 2) | Bi(0 1 2)/Cu(1 1 1) | Bi(0 1 2)/Cu(1 1 1)-Defect |
| H <sup>+</sup> →1/2H <sub>2</sub> | 0.9344    | 0.8194              | 0.7947                     |
| CO <sub>2</sub> →*OCHO            | 0.9043    | 0.8073              | 0.7261                     |
| CO <sub>2</sub> →HCOOH            |           | 0.3902              |                            |
| CO <sub>2</sub> →*COOH            | 1.4943    | 1.2602              | 1.2939                     |
| CO <sub>2</sub> →CO               |           | 0.6880              |                            |

358

359

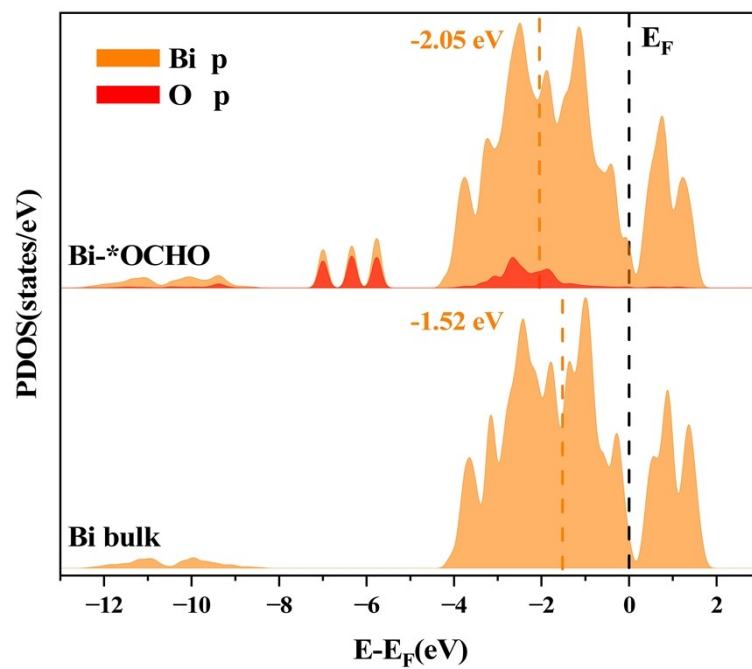

360

361 Figure S21. PDOS of the O p in  $^*\text{OCHO}$  intermediate, the Bi p in  $\text{Bi(0 1 2)}$  model. The orange  
 362 dotted lines indicate the center of the p band of Bi, the black dotted lines indicate the Fermi level.  
 363

364 Table S6. Comparison of the electrocatalytic activities of Bi NSs/CF with other erstwhile reported  
365 Bi-based catalysts for CO<sub>2</sub>RR.

| Catalyst                                                                | Electrolyte                              | Potential<br>(vs. RHE) | FE <sub>Formate</sub><br>(%) | J <sub>Formate</sub><br>(mA·cm <sup>-2</sup> ) | Cathodic<br>EE (%) | Stability | Ref.         |
|-------------------------------------------------------------------------|------------------------------------------|------------------------|------------------------------|------------------------------------------------|--------------------|-----------|--------------|
| Bi nanoparticles                                                        | 0.5 M<br>NaHCO <sub>3</sub>              | -1.01                  | 82                           | 54                                             | 52.35              | 40 h      | 7            |
| Bi NSs-Cu<br>NWs/CC                                                     | 0.5 M<br>KHCO <sub>3</sub>               | -0.86                  | 87                           | ~4                                             | 59.53              | 8 h       | 8            |
| Cu mesh@Bi                                                              | 0.5 M<br>KHCO <sub>3</sub>               | -1.26                  | ~100                         | 68.51                                          | 57.43              | 5 h       | 9            |
| Nano-sized<br>Bi/copper foil                                            | 0.1 M<br>KHCO <sub>3</sub>               | -0.88                  | 91.3                         | ~4                                             | 61.88              | 4 h       | 10           |
| Bi nanodendrites<br>/Cu foil                                            | 0.5 M<br>KHCO <sub>3</sub>               | -0.74                  | ~89                          | 2.7                                            | 64.60              | 12 h      | 11           |
| Bi dendritic<br>/Cu/Si                                                  | 0.1 M<br>KHCO <sub>3</sub>               | -0.9                   | 90                           | ~2                                             | 60.42              | -         | 12           |
| bismuth oxides                                                          | 0.5 M<br>KHCO <sub>3</sub>               | -0.9                   | 91                           | ~8                                             | 61.09              | 24 h      | 13           |
| Bi nanodendrite                                                         | 0.5 M<br>NaHCO <sub>3</sub>              | -1.13                  | 96.4                         | 15.2                                           | 58.41              | 10 h      | 14           |
| nano-Bi                                                                 | 0.5 M<br>KHCO <sub>3</sub>               | -0.93                  | 98.4                         | 9.7                                            | 65.14              | 14 h      | 15           |
| Bi nanosheets                                                           | 0.1M<br>KHCO <sub>3</sub>                | -1.1                   | 86                           | 16.5                                           | 52.78              | 10 h      | 16           |
| Bi <sub>2</sub> S <sub>3</sub> -<br>Bi <sub>2</sub> O <sub>3</sub> @rGO | 0.1 M<br>KHCO <sub>3</sub>               | -0.9                   | 90.1                         | 4                                              | 60.49              | 24 h      | 17           |
| mpBi                                                                    | 0.5 M<br>NaHCO <sub>3</sub>              | -0.9                   | 99                           | 15                                             | 66.46              | 12 h      | 18           |
| Untrathin BiNS                                                          | 0.5 M<br>NaHCO <sub>3</sub>              | -1.06                  | 80                           | 24                                             | 49.96              | 10 h      | 19           |
| Bi/CeOx                                                                 | 0.2 M<br>Na <sub>2</sub> SO <sub>4</sub> | -1.2                   | 98                           | 70                                             | 57.67              | 34 h      | 20           |
| Bi <sub>2</sub> O <sub>3</sub> -NGQDs                                   | 0.5 M<br>KHCO <sub>3</sub>               | -0.9                   | 98.1                         | 18                                             | 65.86              | 15 h      | 21           |
| Bi NSs/CF                                                               | 0.5 M<br>KHCO <sub>3</sub>               | -0.98                  | 93.73                        | ~25.85                                         | 60.65              | -         | This<br>Work |
|                                                                         |                                          | -1.08                  | 92.41                        | ~34.73                                         | 57.21              | 12 h      |              |
|                                                                         |                                          | -1.08(NB)              | 95.36                        | ~37.87                                         | 59.03              | 72 h      |              |

366 Note:

367 cc, carbon cloth.

368 -, this value is not mentioned in the article.

369 NB, experiments were carried out under the conditions of CO<sub>2</sub> nanobubbles.

370

371 **References**

- 372 1. B. Wulan, L. Zhao, D. Tan, X. Cao, J. Ma and J. Zhang, *Advanced Energy Materials*, 2022, **12**,  
373 2103960.
- 374 2. R.-C. Cui, Y.-X. Duan, J.-Y. Xie and Q. Jiang, *Advanced Sustainable Systems*, 2024, **8**, 2300348.
- 375 3. J. P. Edwards, Y. Xu, C. M. Gabardo, D. Cao-Thang, J. Li, Z. Qi, A. Ozden, E. H. Sargent and D.  
376 Sinton, *Applied Energy*, 2020, **261**, 114305.
- 377 4. D. Chen, Z. Chen, L. Chen, Y. Li, S. Xiao and B. Xiao, *Journal of Colloid and Interface Science*,  
378 2022, **607**, 1551-1561.
- 379 5. K. Malik, D. Das, D. Mondal, D. Chattopadhyay, A. K. Deb, S. Bandyopadhyay and A.  
380 Banerjee, *Journal of Applied Physics*, 2012, **112**, 083706.
- 381 6. P. Wang, M. Qiao, Q. Shao, Y. Pi, X. Zhu, Y. Li and X. Huang, *Nat. Commun.*, 2018, **9**, 4933.
- 382 7. D. Wu, X. Wang, X.-Z. Fu and J.-L. Luo, *Appl. Catal. B-Environ.*, 2021, **284**, 119723.
- 383 8. L. Li, F. Cai, F. Qi and D.-K. Ma, *Journal of Alloys and Compounds*, 2020, **841**, 155789.
- 384 9. C. Zhu, Q. Wang and C. Wu, *Journal of Co2 Utilization*, 2020, **36**, 96-104.
- 385 10. W. Lv, J. Zhou, J. Bei, R. Zhang, L. Wang, Q. Xu and W. Wang, *Appl. Surf. Sci.*, 2017, **393**, 191-  
386 196.
- 387 11. J. H. Koh, D. H. Won, T. Eom, N.-K. Kim, K. D. Jung, H. Kim, Y. J. Hwang and B. K. Min, *ACS*  
388 *Catal.*, 2017, **7**, 5071-5077.
- 389 12. Z. B. Hoffman, T. S. Gray, Y. Xu, Q. Lin, T. B. Gunnoe and G. Zangari, *ChemSusChem*, 2019,  
390 **12**, 231-239.
- 391 13. P. Deng, H. Wang, R. Qi, J. Zhu, S. Chen, F. Yang, L. Zhou, K. Qi, H. Liu and B. Y. Xia, *Acs*  
392 *Catalysis*, 2020, **10**, 743-750.
- 393 14. H. Zhong, Y. Qiu, T. Zhang, X. Li, H. Zhang and X. Chen, *J. Mater. Chem. A*, 2016, **4**, 13746-  
394 13753.
- 395 15. Y. Qiu, J. Du, W. Dong, C. Dai and C. Tao, *Journal of Co2 Utilization*, 2017, **20**, 328-335.
- 396 16. W. Zhang, Y. Hu, L. Ma, G. Zhu, P. Zhao, X. Xue, R. Chen, S. Yang, J. Ma, J. Liu and Z. Jin,  
397 *Nano Energy*, 2018, **53**, 808-816.
- 398 17. X. Yang, P. Deng, D. Liu, S. Zhao, D. Li, H. Wu, Y. Ma, B. Y. Xia, M. Li, C. Xiao and S. Ding,  
399 *Journal of Materials Chemistry A*, 2020, **8**, 2472-2480.
- 400 18. H. Yang, N. Han, J. Deng, J. Wu, Y. Wang, Y. Hu, P. Ding, Y. Li, Y. Li and J. Lu, *Advanced*  
401 *Energy Materials*, 2018, **8**, 1801536.
- 402 19. N. Han, Y. Wang, H. Yang, J. Deng, J. Wu, Y. Li and Y. Li, *Nature Communications*, 2018, **9**,  
403 1320.
- 404 20. Y.-X. Duan, Y.-T. Zhou, Z. Yu, D.-X. Liu, Z. Wen, J.-M. Yan and Q. Jiang, *Angewandte*  
405 *Chemie-International Edition*, 2021, **60**, 8798-8802.
- 406 21. Z. Chen, K. Mou, X. Wang and L. Liu, *Angewandte Chemie-International Edition*, 2018, **57**,  
407 12790-12794.

408
